# Supplementary material for: A method for human teratogen detection by geometrically confined cell differentiation and migration
Source: PubMed Central journal article supplement (PMC4428054; doi:10.1038/srep10038), 2015-05-12
Supplement: srep10038-s5.pdf [file srep10038-s5.pdf]

## **Supplementary Information**

### **A method for human teratogen detection by geometrically confined cell differentiation and migration**

Jiangwa Xing, Yi-Chin Toh, Shuoyu Xu, Hanry Yu

## Supplementary Figures and Legends

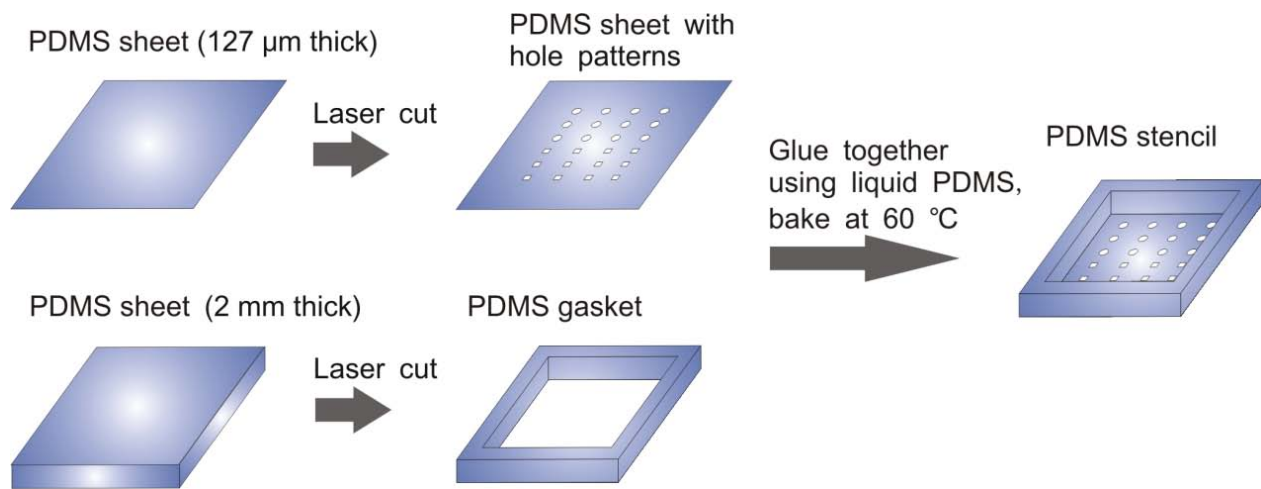

**Supplementary Figure S1 | Generation of PDMS stencil for micropatterning.** A laser-cutter was used to cut the designed patterns and corresponding gasket on a 127 μm thick PDMS sheet and a 2mm thick PDMS sheet respectively. After that, the two components were glued together using liquid PDMS and baked at 60°C for 3-4 hr to finally get the PDMS stencil for micropatterning.

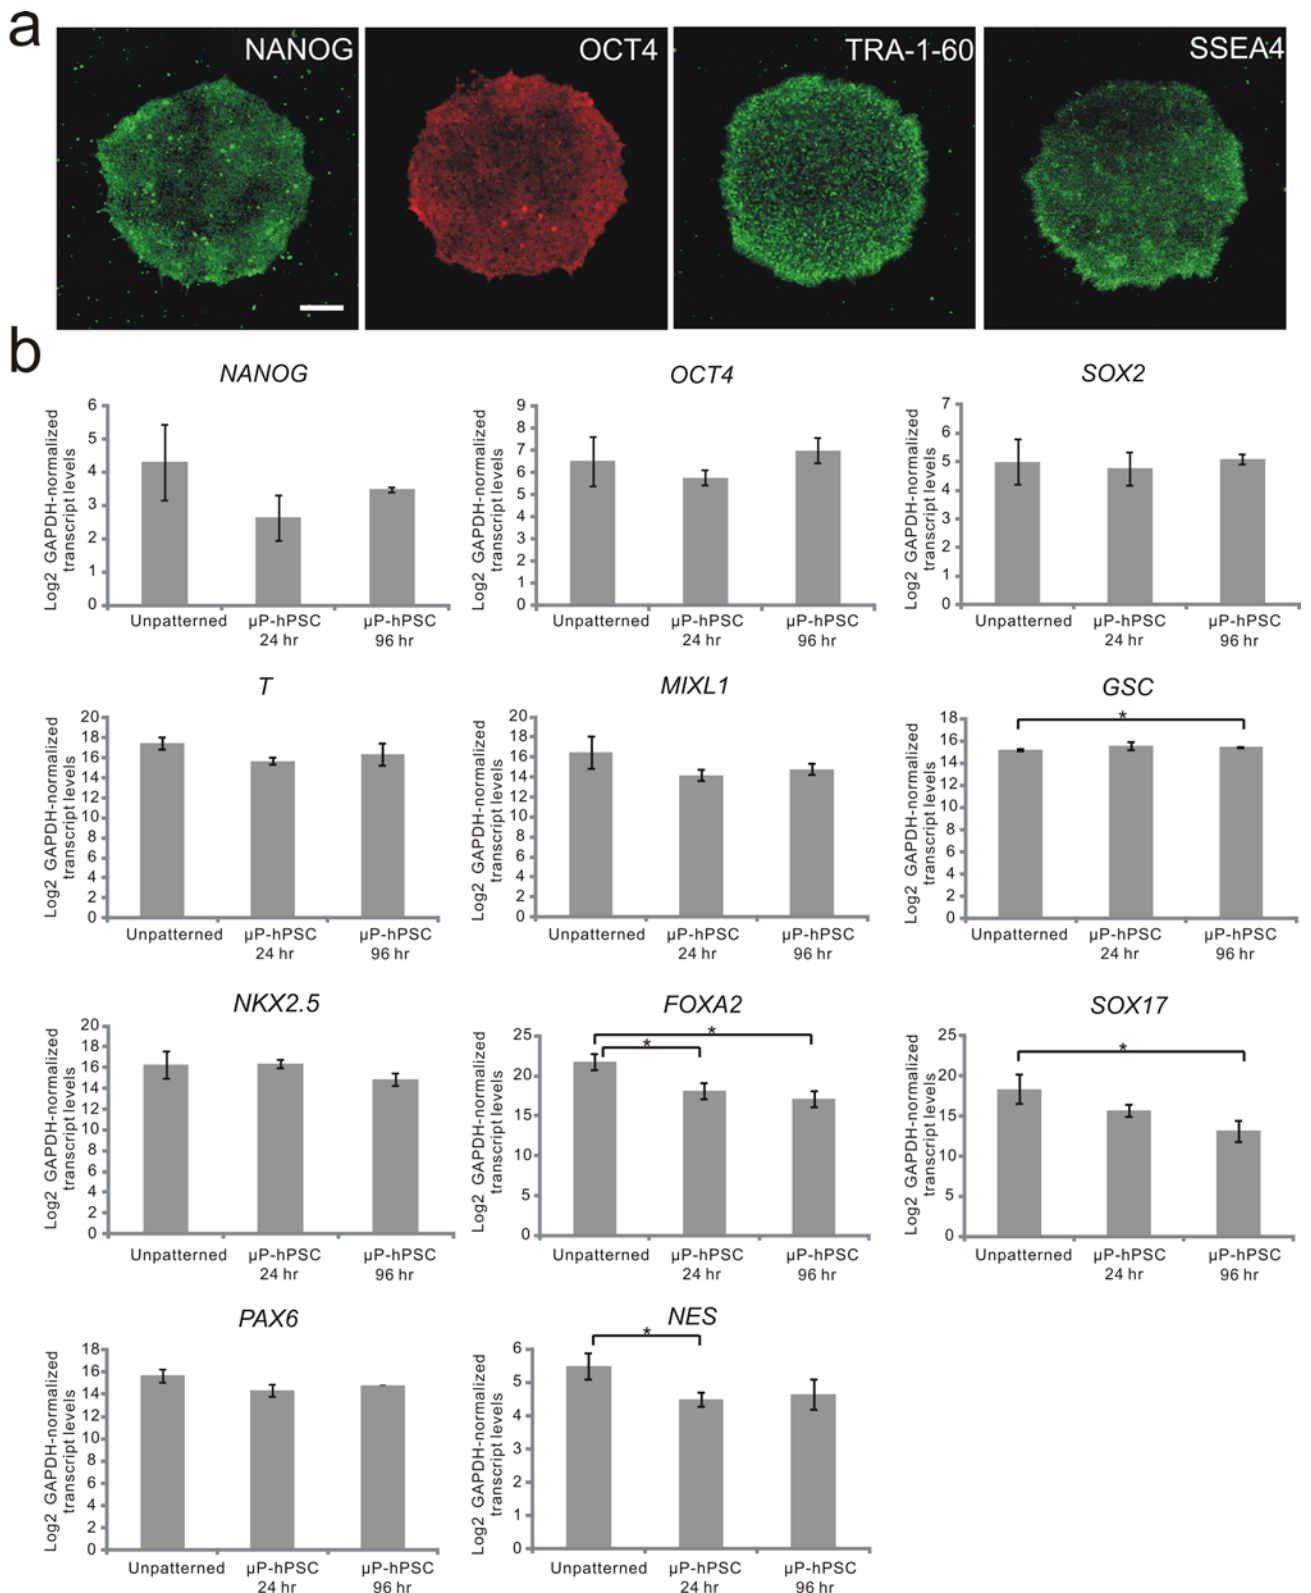

**Supplementary Figure S2 | Cells in  $\mu$ P-hPSC colonies maintained pluripotency in mTeSR<sup>TM</sup>1 maintenance medium.** (a) Immunofluorescence analysis of pluripotency markers in  $\mu$ P-hPSC colonies 24 hr after patterning. Expression of transcription factors OCT4 and NANOG and surface antigens TRA-1-60 and SSEA4 was observed. Scale bar = 200  $\mu$ m. (b) RT-PCR analysis of expression levels of pluripotency markers and lineage-specific markers in conventional unpatterned hPSCs and  $\mu$ P-hPSCs. Unpatterned hPSCs were lysed from normal hPSC culture when cells were

70%-80% confluent. The  $\mu$ P-hPSC colonies were cultured in mTeSR<sup>TM</sup>1 maintenance medium and lysed for RT-PCR analysis 24 hr and 96 hr post patterning. Both unpatterned hPSCs and  $\mu$ P-hPSCs showed high expression levels of pluripotency markers and low expression levels of lineage-specific markers. Pluripotency markers: *NANOG*, *OCT4*, *SOX2*; Mesoendoderm markers: *T*, *MIXL1*, *GSC*, *NKX2.5*, *FOXA2* and *SOX17*; Ectoderm markers: *PAX6*, *NES* (nestin). Data are average  $\pm$  s.d of three experiments with duplicate samples. \*,  $p < 0.05$  in paired t-test.

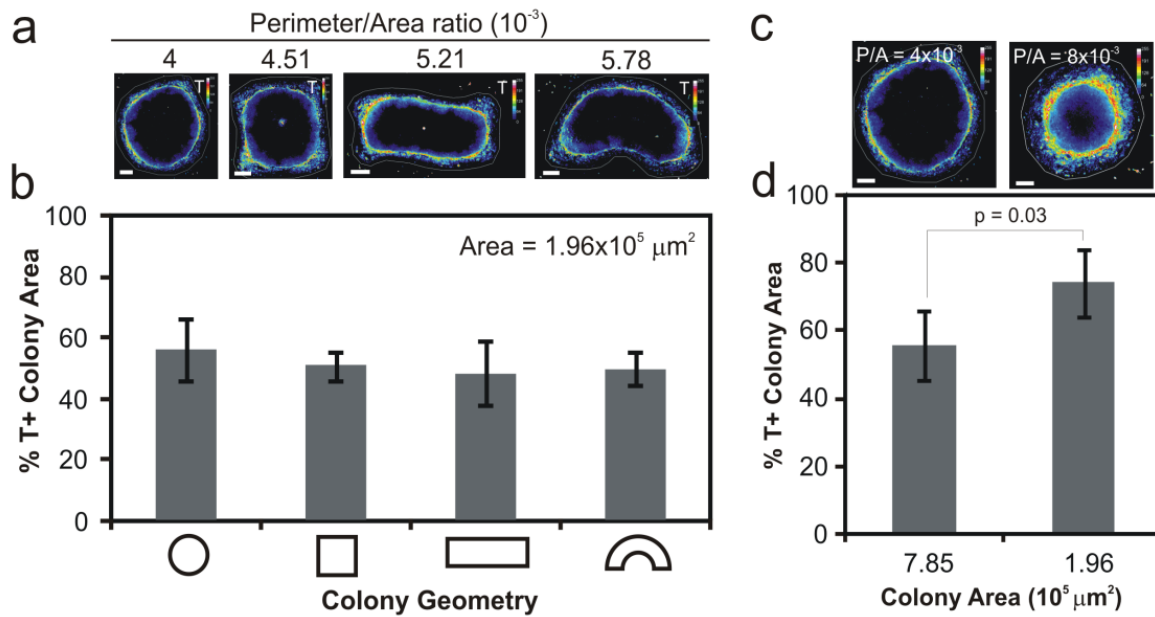

**Supplementary Figure S3 | Effect of colony geometry and size on the generation of mesoendoderm patterns.** (a-b) hPSCs were micropatterned on Matrigel islands of different geometries for a fixed colony area and differentiated for 3 days. (a) Intensity maps of T expression in the  $\mu$ P-hPSC colonies after 3 days, indicating that the shape of the mesoendoderm patterns corresponded with the geometry of the Matrigel island on which cells were patterned. (b) Quantification of T<sup>+</sup> colony area showing that there was no significant difference in the extent of mesoendoderm differentiation between different colony geometries (One-way ANOVA). (c-d) hPSCs were micropatterned on circular Matrigel islands of different size with different perimeter-to-area (P/A) ratios and differentiated for 3 days. (c) Intensity maps of T expression in the  $\mu$ P-hPSC colonies after 3 days showing similar geometries of mesoendoderm patterns. (d) Quantification of T<sup>+</sup> colony area showing that larger P/A ratio resulted in a significant increase in extent of mesoendoderm differentiation (Student's t-test). Data in (b,d) are average  $\pm$  s.e.m of 6 colonies. Scale bars = 200  $\mu\text{m}$ .

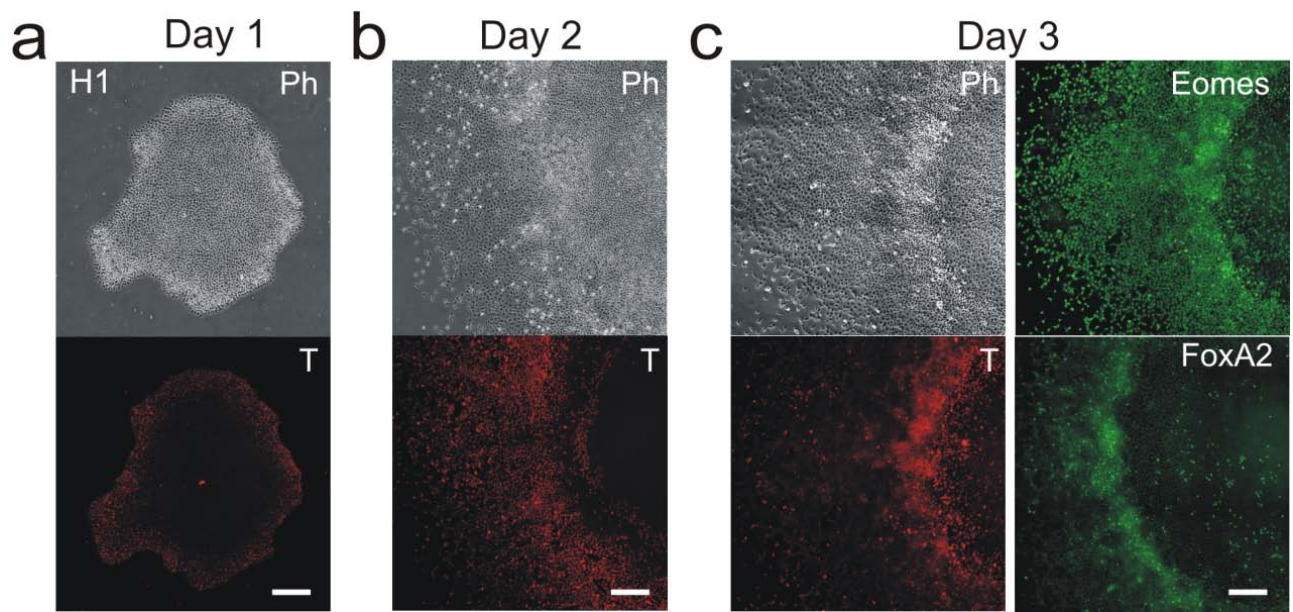

**Supplementary Figure S4 | Mesoendoderm differentiation in unpatterned hPSC colonies.** (a-c) Phase and fluorescent images of mesoendoderm markers for samples fixed on day 1 (a), day 2 (b) and day 3 (c). Scale bar, 200  $\mu\text{m}$ .

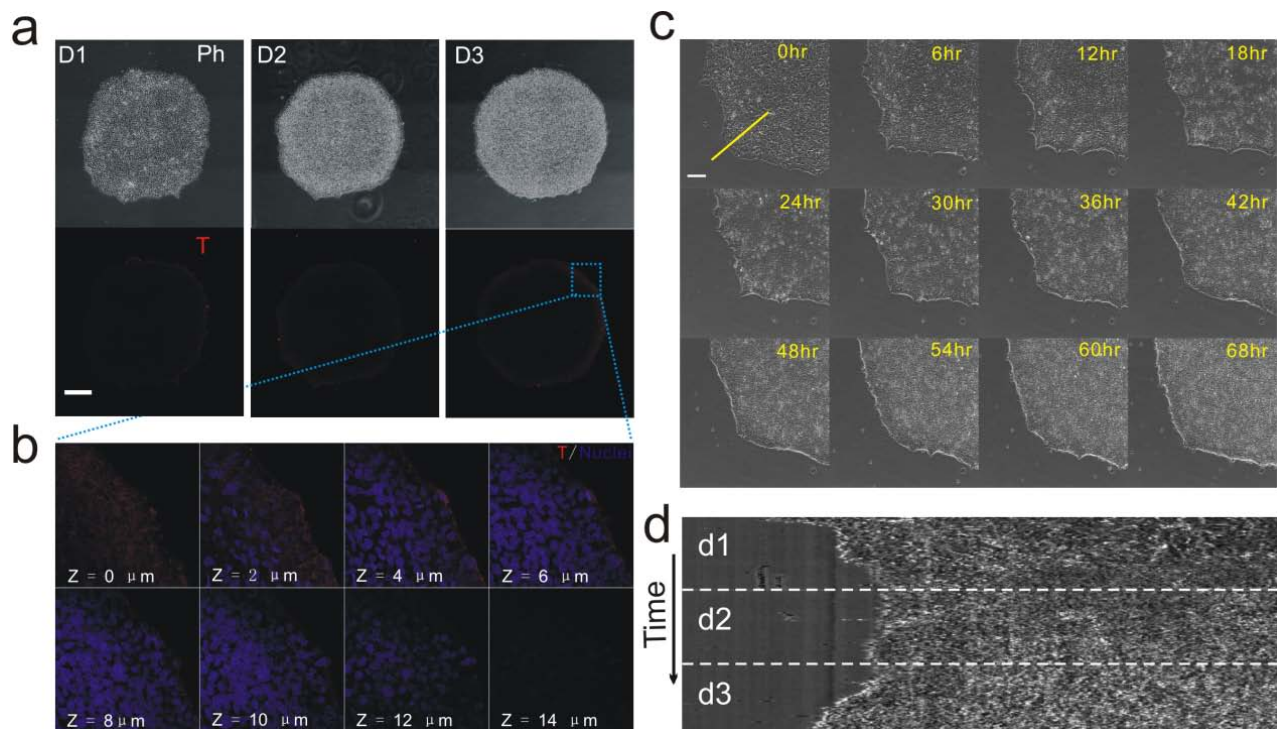

**Supplementary Figure S5| No similar annular mesoendoderm pattern formed after 3-day culture in basal STEMdiff<sup>TM</sup> APEL<sup>TM</sup> medium.** (a) Phase and fluorescent mesoendoderm marker T images on day 1 to day 3. Scale bar, 200  $\mu$ m. (b) Confocal z-stack images of T and cell nuclei within a  $\mu$ P-hPSC colony fixed on day 3. (c) Montage from a 3-day phase imaging on about one quarter of a circular  $\mu$ P-hPSC colony. Scale bar, 100  $\mu$ m. (d) Kymograph analysis showing the movement of cells along the yellow line shown in (c) throughout the 3-day live imaging time frame.

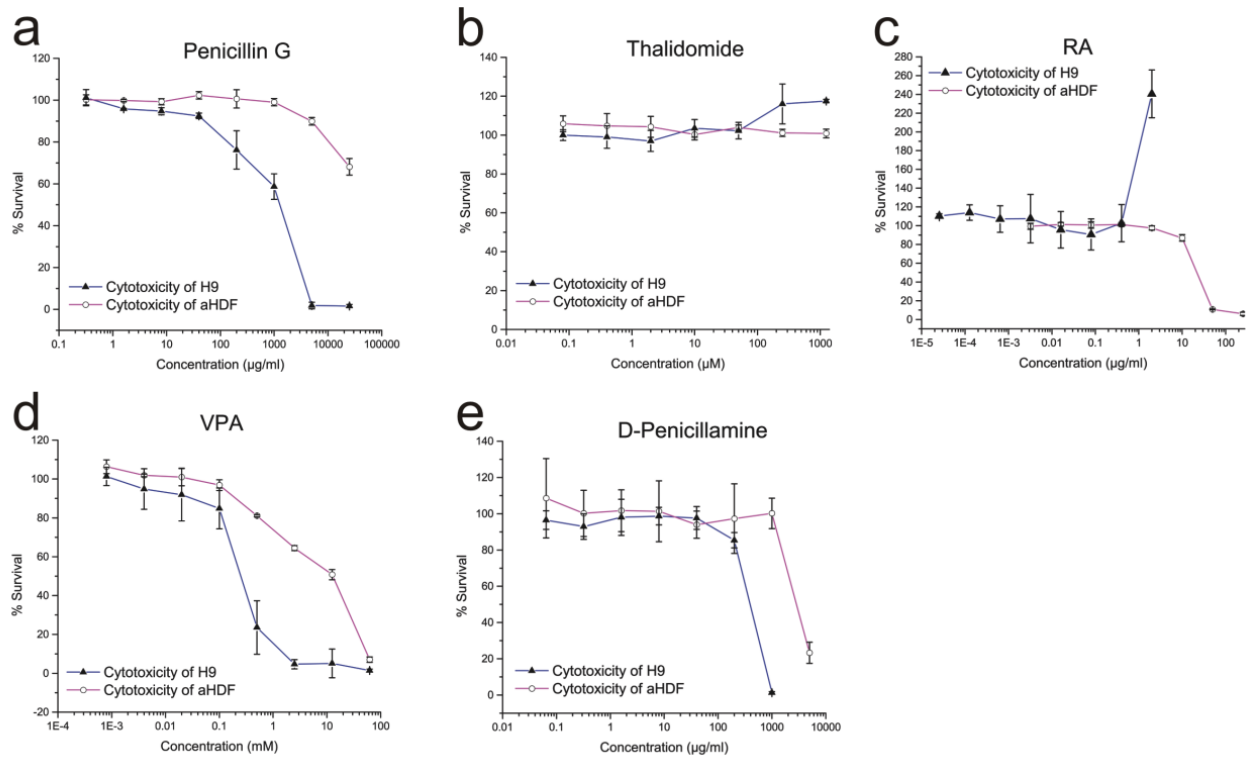

**Supplementary Figure S6 | Cytotoxicity results of the five tested drugs.** (a-e) Cell viability curves for drug treatment in H9 human embryonic stem cells (blue line) and adult human adult fibroblasts (aHDFs) (pink lines) (n = 3).



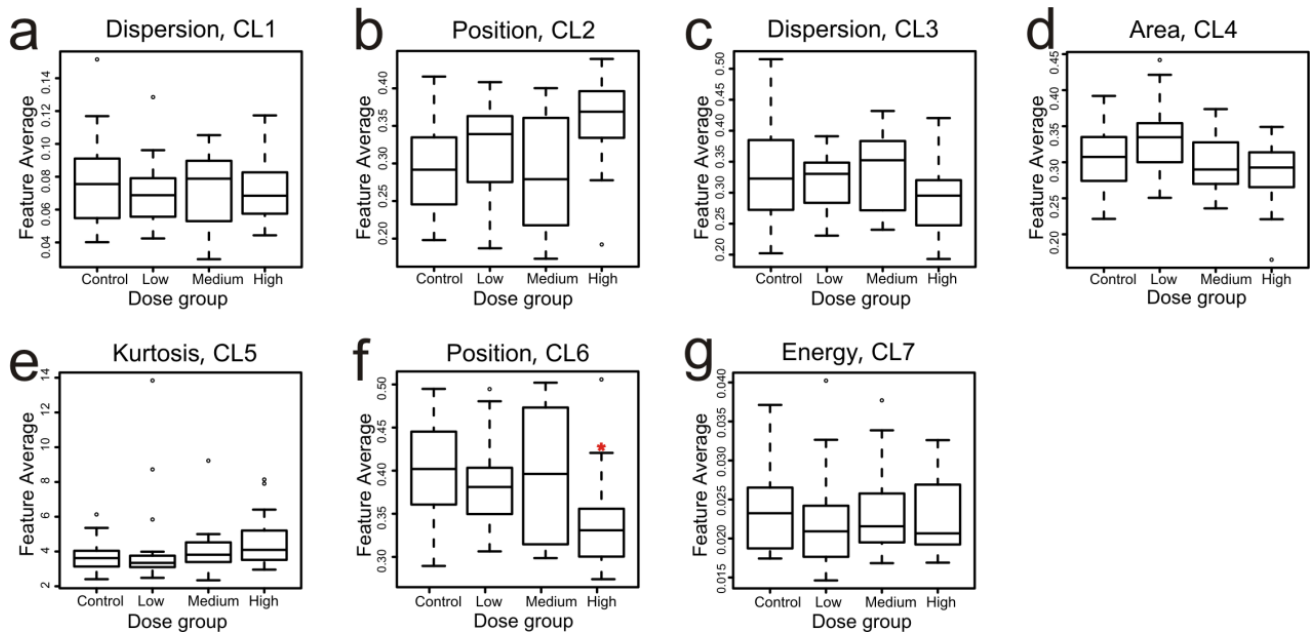

**Supplementary Figure S7 | Boxplots of morphologic cluster readout in Penicillin G test groups.**

\*:  $p < 0.0083$  in post-hoc analysis. Low: 40  $\mu\text{g/ml}$ ; Medium: 200  $\mu\text{g/ml}$ ; High: 1000  $\mu\text{g/ml}$

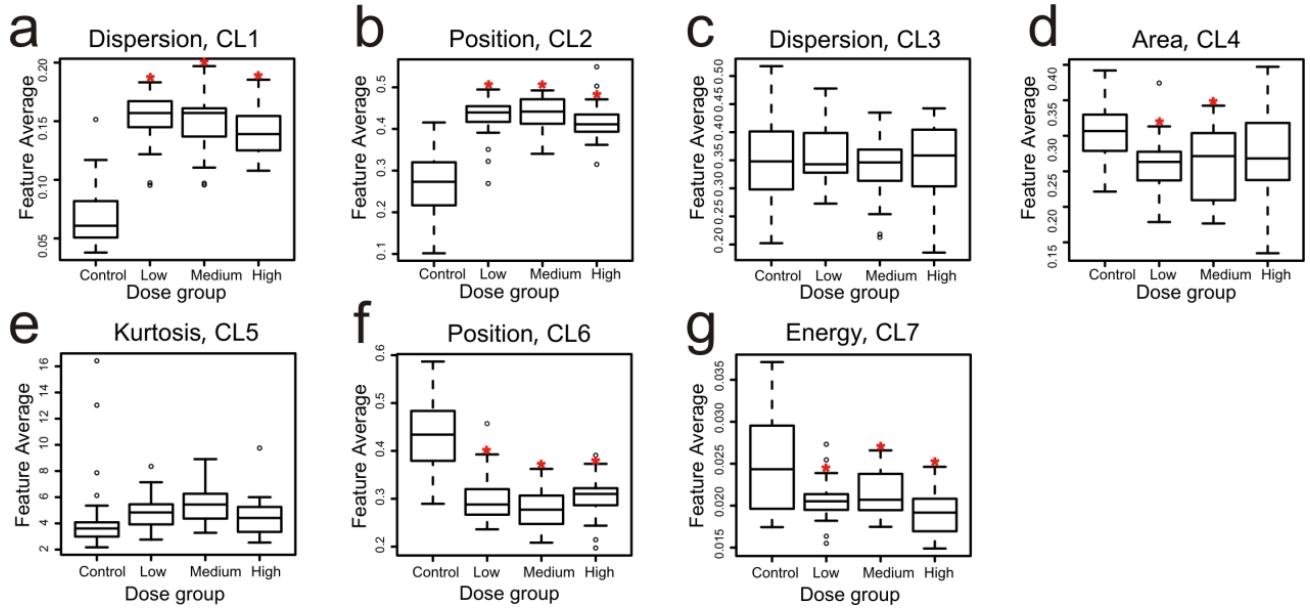

**Supplementary Figure S8 | Boxplots of morphologic cluster readout in Thalidomide test groups.**  
 Low: 30  $\mu$ M ; Medium: 300  $\mu$ M; High: 800  $\mu$ M.

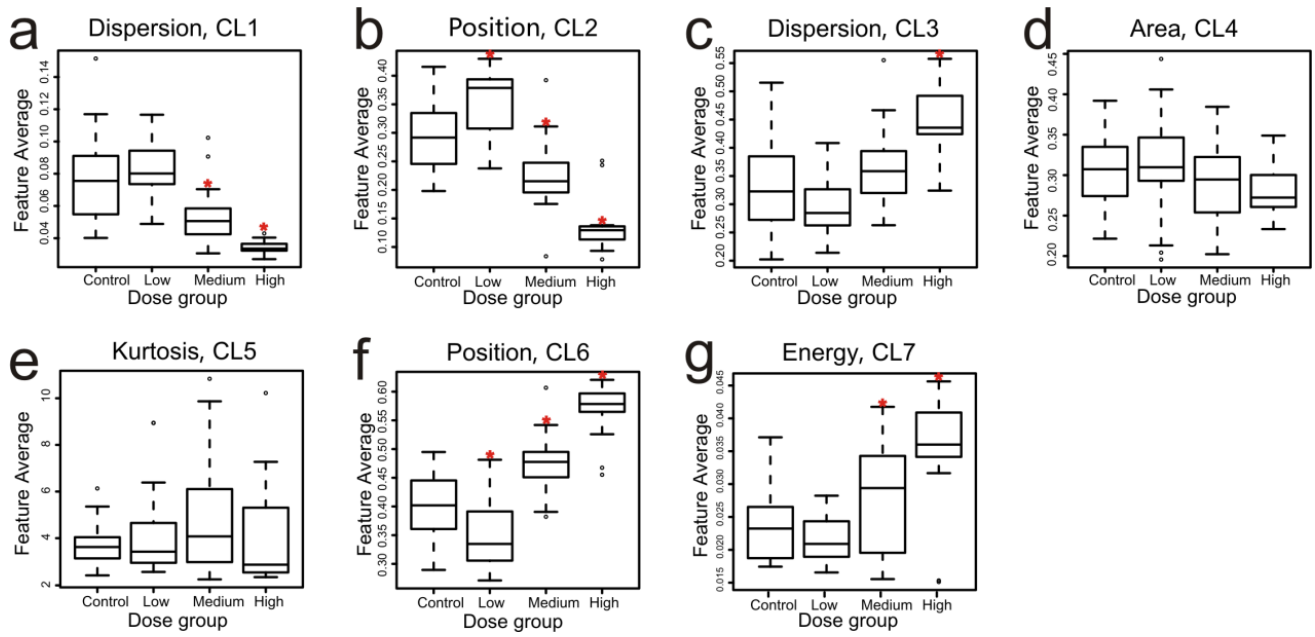

**Supplementary Figure S9 | Boxplots of morphologic cluster readout in RA test groups. Low: 0.00036  $\mu\text{g/ml}$  ; Medium: 0.0036  $\mu\text{g/ml}$ ; High: 0.036  $\mu\text{g/ml}$ .**

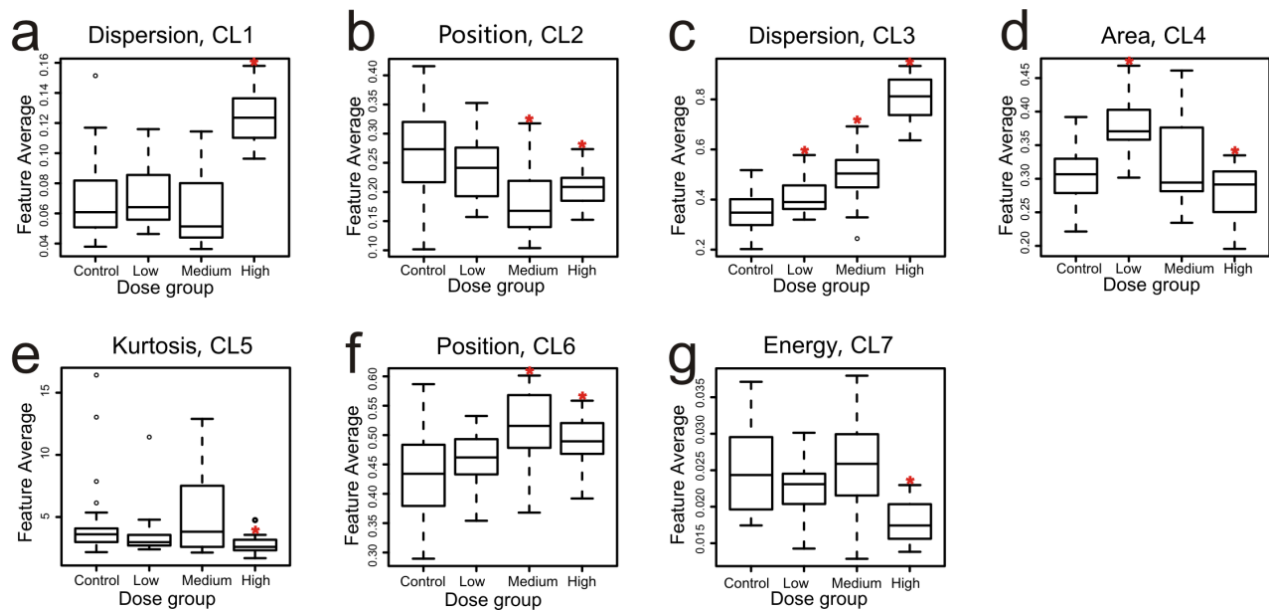

**Supplementary Figure S10 | Boxplots of morphologic cluster readout in D-penicillamine test groups.** Low: 200  $\mu\text{g/ml}$  ; Medium: 400  $\mu\text{g/ml}$ ; High: 800  $\mu\text{g/ml}$ .

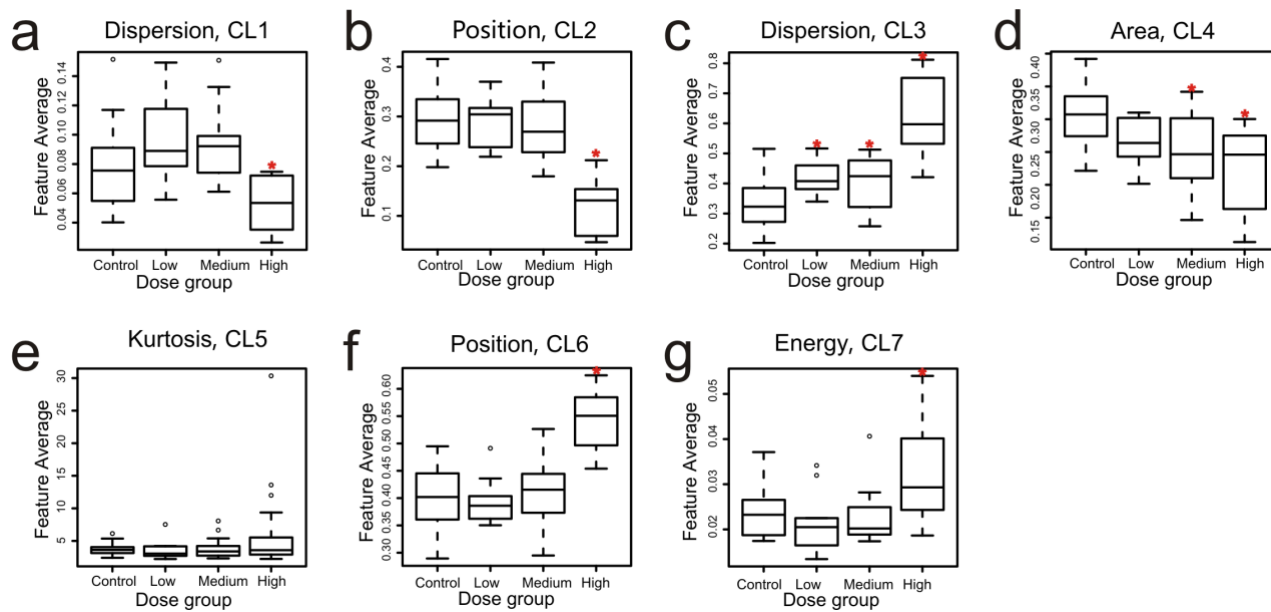

**Supplementary Figure S11 | Boxplots of morphologic cluster readout in VPA test groups. Low: 0.1 mM; Medium: 0.4 mM; High: 0.8 mM.**

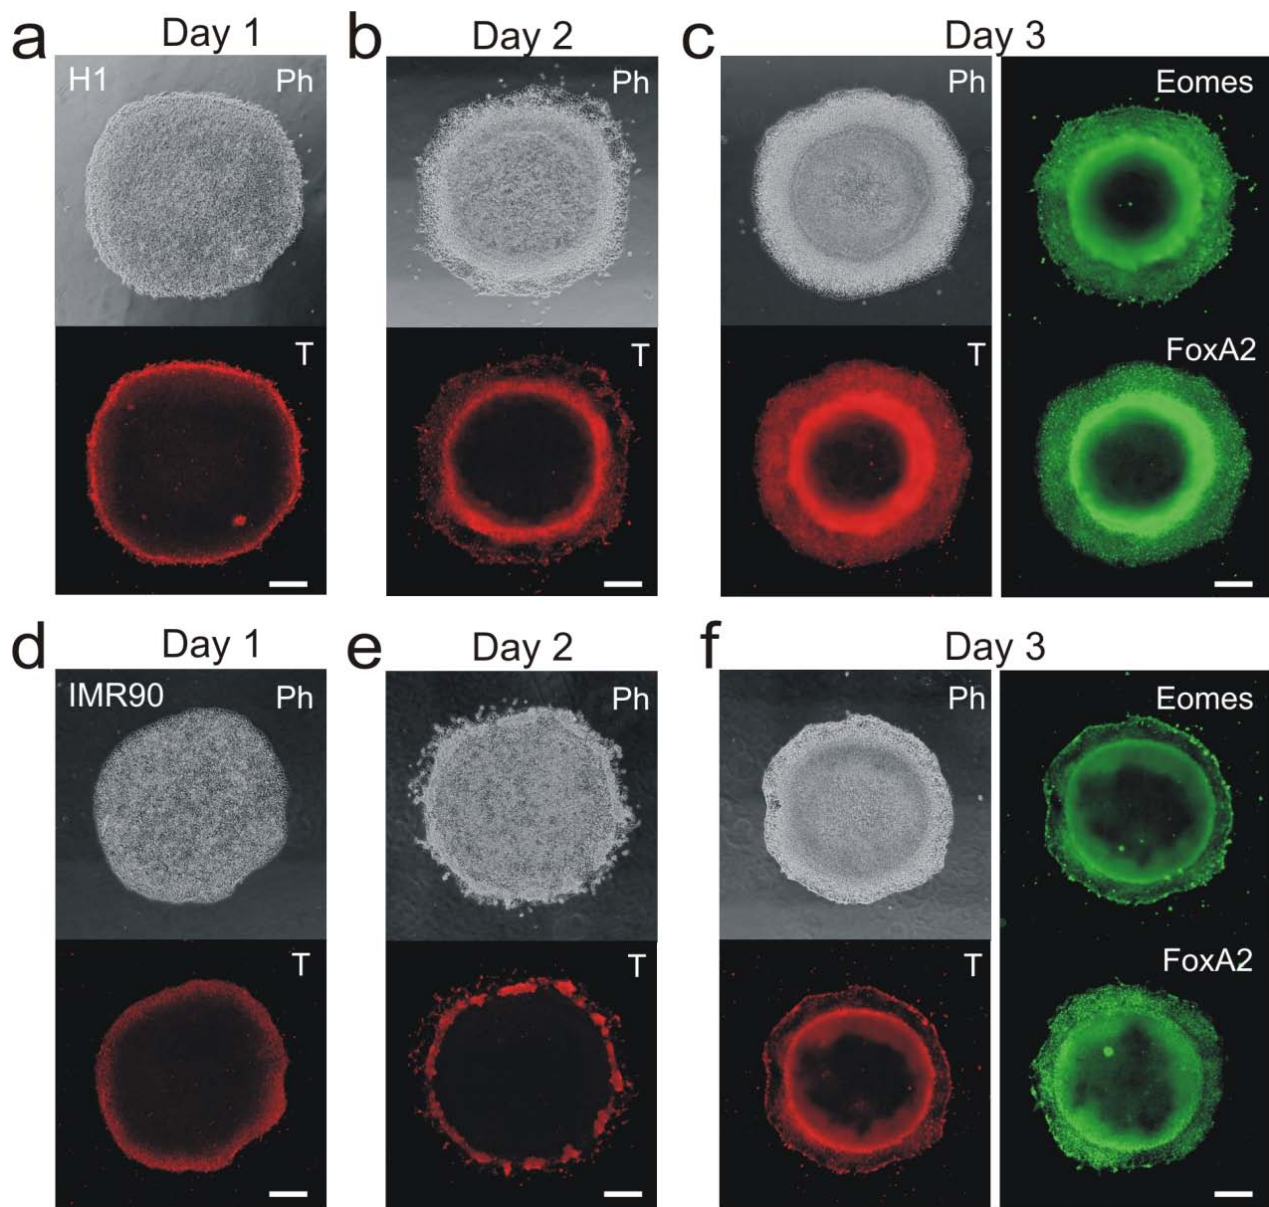

**Supplementary Figure S12 | Generation of annular mesoendoderm pattern in H1 human embryonic stem cell and IMR90 induced pluripotent stem cells.** (a-f) 3-day phase and fluorescent images of  $\mu$ P-hPSC colonies formed by H1 cells (a-c) and IMR90 cells (d-f). Scale bar, 200  $\mu$ m.

## Supplementary Tables

**Supplementary Table 1 | Compound list for teratogen screening in the  $\mu$ P-hESC model**

| No. | Compounds              | Drug Application                                        | US FDA<br>Pharmaceutical<br>Pregnancy<br>Category* | <i>In vivo</i> human<br>data | In mEST         |
|-----|------------------------|---------------------------------------------------------|----------------------------------------------------|------------------------------|-----------------|
| 1   | Thalidomide            | Anti-nausea and<br>sedative drug                        | Pregnancy risk<br>category X                       | Teratogenic <sup>1</sup>     | N.A.            |
| 2   | Retinoic acid<br>(RA)  | Antineoplastic drug                                     | Pregnancy risk<br>category D                       | Teratogenic <sup>2</sup>     | Teratogenic     |
| 3   | D-Penicillamine        | For Wilson's disease<br>and heavy metal<br>intoxication | Pregnancy risk<br>category D                       | Teratogenic <sup>3</sup>     | Non-teratogenic |
| 4   | Valproic acid<br>(VPA) | Anticonvulsant and<br>mood-stabilizing<br>drug          | Pregnancy risk<br>category D                       | Teratogenic <sup>4</sup>     | Teratogenic     |
| 5   | Penicillin G           | Antibiotics,<br>antibacterial drug                      | Pregnancy risk<br>category B                       | Non-teratogenic <sup>5</sup> | Non-teratogenic |

\*: There are five categories. Category A indicates no pregnancy risk in human, Category B indicates no risk in animal studies, Category C shows positive pregnancy risk in animals, and Category D & X indicate clear risks in pregnant women.

**Supplementary Table 2 | The DC and C<sub>max</sub> values of test compounds**

| No. | Compounds       | DC in $\mu$ P-hPSC model | C <sub>max</sub> | Reference                         |
|-----|-----------------|--------------------------|------------------|-----------------------------------|
| 1   | Thalidomide     | 30 $\mu$ M               | 10.922 $\mu$ M   | Teo et al. (2004) <sup>6</sup>    |
| 2   | RA              | 0.36 ng/ml               | 347 ng/ml        | Muindi et al. (1992) <sup>7</sup> |
| 3   | D-penicillamine | 200 $\mu$ g/ml           | 200 $\mu$ g/ml   | Netter et al. (1987) <sup>8</sup> |
| 4   | VPA             | 0.1 mM                   | 0.574 mM         | Reed et al. (2006) <sup>9</sup>   |
| 5   | Penicillin G    | 1000 $\mu$ g/ml          | 400 $\mu$ g/ml   | Plaut et al. (1969) <sup>10</sup> |



**Supplementary Table 3 | Primer sequence/Catalogue number used for quantitative RT-PCR**

| <b>Primer</b>        | <b>Sequence/Cat# (Genecopoeia)</b> |
|----------------------|------------------------------------|
| <i>GAPDH</i>         | HQP006940                          |
| <i>NANOG</i>         | HQP019390                          |
| <i>OCT4</i>          | HQP013600                          |
| <i>SOX2</i>          | HQP017628                          |
| <i>BRACHYURY (T)</i> | HQP017857                          |
| <i>LEFTY2</i>        | HQP018049                          |
| <i>FGF8</i>          | HQP005414                          |
| <i>NKX2.5</i>        | HQP003440                          |
| <i>FOXA2</i>         | HQP008906                          |
| <i>SOX17</i>         | HQP016906                          |
| <i>PAX6</i>          | HQP054281                          |
| <i>NESTIN</i>        | HQP000899                          |
| <i>MIXL1</i> FP      | 5' – ATTTTCTCCCCTCTTCCAGGT – 3'    |
| <i>MIXL1</i> RP      | 5' – GGCCTAGCCAAAGGTTGGAA – 3'     |
| <i>GSC</i> FP        | 5' – GGACTTGCACAGACAGACGA – 3'     |
| <i>GSC</i> RP        | 5' – GGTTCCTCTTTCTCGACCCC – 3'     |
| <i>E-cadherin</i> FP | 5' – TGCCCAGAAAATGAAAAAGG – 3'     |
| <i>E-cadherin</i> RP | 5' – GTGTATGTGGCAATGCGTTC – 3'     |
| <i>N-cadherin</i> FP | 5' – ACAGTGGCCACCTACAAAGG – 3'     |
| <i>N-cadherin</i> RP | 5' – CCGAGATGGGGTTGATAATG – 3'     |
| <i>VIM</i> FP        | 5' – GAGAACTTTGCCGTTGAAGC – 3'     |
| <i>VIM</i> RP        | 5' – GCTTCCTGTAGGTGGCAATC – 3'     |
| <i>TWIST</i> FP      | 5' – ATGTCCGCGTCCCCTAGCA – 3'      |
| <i>TWIST</i> RP      | 5' – ACGGGCCTGTCTCGCTTTCT – 3'     |
| <i>SNAIL</i> FP      | 5' – CACATCAGCCCCACAGGACT – 3'     |
| <i>SNAIL</i> RP      | 5' – CAGACAGGCCAGCTCAGGAA – 3'     |

## Supplementary Video Legends

**Supplementary Video 1 | Cell movement in untreated control  $\mu$ P-hPSC colony under mesoendoderm induction.** 3-day timelapse video of about one quarter of a  $\mu$ P-hPSC colony under mesoendoderm induction. Images were taken every 20 min, and the play speed was 20 fps. Scale bar, 100  $\mu$ m.

**Supplementary Video 2 | Cell movement in  $\mu$ P-hPSC colony without mesoendoderm induction.** 3-day timelapse video of about one quarter of a  $\mu$ P-hPSC colony cultured in basal STEMdiff<sup>TM</sup> APEL<sup>TM</sup> medium. Images were taken every 20 min, and the play speed was 20 fps. Scale bar, 100  $\mu$ m.

**Supplementary Video 3 | Cell movement in Thalidomide-treated  $\mu$ P-hPSC colony under mesoendoderm induction.** 3-day timelapse video of about one quarter of a  $\mu$ P-hPSC colony under Thalidomide treatment. Cells moved much inwards toward colony centre compared with cells in untreated control colonies. Images were taken every 20 min, and the play speed was 20 fps. Scale bar, 100  $\mu$ m.

**Supplementary Video 4 | Cell movement in Penicillin G-treated  $\mu$ P-hPSC colony under mesoendoderm induction.** 3-day timelapse video of about one quarter of a  $\mu$ P-hPSC colony under Penicillin G treatment. The collective cell migration process was similar as that of untreated  $\mu$ P-hPSC colonies. Images were taken every 20 min, and the play speed was 20 fps. Scale bar, 100  $\mu$ m.

## Supplementary References

1. Brent, R.L. & Holmes, L.B. Clinical and basic science lessons from the thalidomide tragedy: what have we learned about the causes of limb defects? *Teratology* **38**, 241-51 (1988).
2. Lammer, E.J. et al. Retinoic acid embryopathy. *N. Engl. J. Med.* **313**, 837-41 (1985).
3. Rosa, F.W. Teratogen update: penicillamine. *Teratology* **33**, 127-31 (1986).
4. Lammer, E.J., Sever, L.E. & Oakley, G.P., Jr. Teratogen update: valproic acid. *Teratology* **35**, 465-73 (1987).
5. Novartis, *Penicillin G Sodium injection*. (2009) Available at: <http://www.medsafe.govt.nz/profs/datasheet/p/penicillinginj.pdf>. (Accessed: 7th November 2014).
6. Teo, S.K. et al. Clinical pharmacokinetics of thalidomide. *Clin. Pharmacokinet.* **43**, 311-27 (2004).
7. Muindi, J.R. et al. Clinical pharmacology of oral all-trans retinoic acid in patients with acute promyelocytic leukemia. *Cancer Res.* **52**, 2138-42 (1992).
8. Netter, P., Bannwarth, B., Pere, P. & Nicolas, A. Clinical pharmacokinetics of D-penicillamine. *Clin. Pharmacokinet.* **13**, 317-33 (1987).
9. Reed, R.C., Dutta, S., Cavanaugh, J.H., Locke, C. & Granneman, G.R. Every-12-hour administration of extended-release divalproex in patients with epilepsy: impact on plasma valproic acid concentrations. *Epilepsy Behav.* **8**, 391-6 (2006).
10. Plaut, M.E., O'Connell, C.J., Pabico, R.C. & Davidson, D. Penicillin handling in normal and azotemic patients. *J. Lab. Clin. Med.* **74**, 12-8 (1969).
